# Supplementary material for: Co-Evolution of Mitochondrial tRNA Import and Codon Usage Determines Translational Efficiency in the Green Alga Chlamydomonas
Source: PLoS Genet. 2012 Sep 20;8(9):e1002946. doi: 10.1371/journal.pgen.1002946 (PMC3447967; doi:10.1371/journal.pgen.1002946)
Supplement: Figure S1 — Alignment of the wild-type and the modified genes. Modified nucleic acids are indicated in white. (PDF) [file pgen.1002946.s001.pdf]

Figure S1

|               |                                                                                                                     |
|---------------|---------------------------------------------------------------------------------------------------------------------|
| modified_cob  | ATGCGTATGCATAACAAAATTCAATTGTTGAGTGTA                                                                                |
| wild-type_cob | ATGCGTATGCATAACAAAATTCAATTGTTGAGTGTA                                                                                |
| modified_cob  | TGCTAGCTAGTCAAATGCTTACTGGGATTCTACTAGCCATGC                                                                          |
| wild-type_cob | TGCTAGCTAGTCAAATGCTTACTGGTATTCTACTAGCCATGC                                                                          |
| modified_cob  | CTTGCGTTACGCTCAGCTAACGGGGCCAGCTTGTCTTTATTGTAGTCTATT                                                                 |
| wild-type_cob | CTTGCGTTACGCTCAGCTAACGGCGCCAGCTTGTCTTTATTGTAGTCTATT                                                                 |
| modified_cob  | AGTGGGGTCGTTATCTTGTGGTAATGATTATCACCGCCTTCATTGGGTATGTACTACCATGGGGCAAATGTCTTTCTGGGGGCTACCGTAATTACTAGTTTGGCTACTGCCA    |
| wild-type_cob | AGTGGGTTCGTTATCTTGTGGTAATGATTATCACCGCCTTCATTGGTTATGTACTACCATGGGGCAAATGTCTTTCTGGGGTCTACCGTAATTACTAGTTTGGCTACTGCCA    |
| modified_cob  | TTCCAGTAGTAGGGAAACACATCATGTACTGGTTGTGGGGGGGTTTCAGTGTGATAACCCAACTTGAACCGCTTCTACAGCTTCCACTACACTCTACCACTCATCTTGGCTGG   |
| wild-type_cob | TTCCAGTAGTAGGTAAACACATCATGTACTGGTTGTGGGGTGGTTTCAGTGTGATAACCCAACTTGAACCGCTTCTACAGCTTCCACTACACTCTACCACTCATCTTGGCTGG   |
| modified_cob  | GTTGAGCGTATCCACATTGCCGCCTTGCACCAATACGGGAGTACTAACCCTAGGGGTTAACAGCCAAAGCAGCCTAATTTCTTTTCGGGTCTTACTTTGGGGCTAAAGACCTG   |
| wild-type_cob | TTTGAGCGTATCCACATTGCCGCCTTGCACCAATACGGTAGTACTAACCCTAGGTGTTAACAGCCAAAGCAGCCTAATTTCTTTTCGGTTCTTACTTTGGTGCTAAAGACCTG   |
| modified_cob  | GTGCGGGCTTTGTTCTTGGCTCTTGTGTTTCAGCATCTAGTCTTCTTCTACCCAGACTTGTGGGGCACCCAGACAACCTAATCCAGCTAACCCTATAGCACCCACAACACA     |
| wild-type_cob | GTGCGGTGCTTTGTTCTTGGCTCTTGTGTTTCAGCATCTAGTCTTCTTCTACCCAGACTTGTGGGTACCCAGACAACCTAATCCAGCTAACCCTATAGCACCCACAACACA     |
| modified_cob  | TTGTACCAGAGTGGTACTTCTTGTGGGTATACGCTATTCTACGTTCATTCCAAACAAAGCTATGGGGGTATTGGCTATTGGGCTAGTCTTCGCTAGTTTGTGGCTATGCCATT   |
| wild-type_cob | TTGTACCAGAGTGGTACTTCTTGTGGGTATACGCTATTCTACGTTCATTCCAAACAAAGCTATGGGCGTATTGGCTATTGGTCTAGTCTTCGCTAGTTTGTGGCTATGCCATT   |
| modified_cob  | CATCGGGTTGGGGGGGGGAAATTCCGCATCATCACTGAGTGGCTATACTGGACTTTCCTTGCTGATGTATTGCTATTGACCTGGTTGGGGGGGAACGAGATTACTCCAATTACC  |
| wild-type_cob | CATCGGTTTGGGCGGTGGTAAATTCCGCATCATCACTGAGTGGCTATACTGGACTTTCCTTGCTGATGTATTGCTATTGACCTGGTTGGGTGGTAACGAGATTACTCCAATTACC |
| modified_cob  | TCCTTCGTCGGACAGTGC                                                                                                  |
| wild-type_cob | TCCTTCGTCGGACAGTGC                                                                                                  |
