# Supplementary material for: Co-Evolution of Mitochondrial tRNA Import and Codon Usage Determines Translational Efficiency in the Green Alga Chlamydomonas
Source: PubMed Central journal article supplement (PMC3447967; doi:10.1371/journal.pgen.1002946), 2012-09-20
Supplement: pgen.1002946.s002.pdf [file pgen.1002946.s002.pdf]

## Figure S2

modified\_nd4 ATGTTTATTTCTGTTTTGTTGATTTTGTGTTTGTGCTTTGTGCGTTACTTTGATTCCAGAGGCCATTATCATATGGTCGGCGTTTGGAGTTTTGTAGCCACTATTATCCCTATGTGGT  
wild-type\_nd4 ATGTTTATTTCTGTTTTGTTGATTTTGTGTTTGTGCTTTGTGCGTTACTTTGATTCCAGAGGCCATTATCATATGGTCGGCGTTTGGAGTTTTGTAGCCACTATTATCCCTATGTGGT

modified\_nd4 AGTTACTTGGATGTGGTGAATTTTGTGCTTCTGGCCACGGCTACAAAATGTTGGTTATCCTAGGACGTAGTCACCTTGCTTTTGGGATCGATGGCTAGCTCTAAGCTTGATGC  
wild-type\_nd4 AGTTACTTGGATGTGGTGAATTTTGTGCTTCTGGCCACGGCTACAAAATGTTGGTTATCCTAGGACGTAGTCACCTTGCTTTTGGGATCGATGGCTAGCTCTAAGCTTGATGC

modified\_nd4 TATTGACCACCGTTTTGTTCCCTATTTGCATGATGTTGCTGCGCACTGTAGCCGGCTTTATGACCTTTATTTTGTAGAGGTTCTAGTACTTAGTGCCCTGTGCGTCTGGATCTA  
wild-type\_nd4 TATTGACCACCGTTTTGTTCCCTATTTGCATGATGTTGCTGCGCACTGTAGCCGGCTTTATGACCTTTATTTTGTAGAGGTTCTAGTACTTAGTGCCCTGTGCGTCTGGATCTA

modified\_nd4 TTGGGTTTCTACATTTTGTTCGAGGCTAGTCTTATCTTGCTTTTCTTGTGATTGGCCGTGCTCCTTACGGAAGCCTAGAGGCTGCTTACAAAATGTACTTTACACTATGGCCGG  
wild-type\_nd4 TTGGGTTTCTACATTTTGTTCGAGGCTAGTCTTATCTTGCTTTTCTTGTGATTGGCCGTGCTCCTTACGGAAGCCTAGAGGCTGCTTACAAAATGTACTTTACACTATGGCCGG

modified\_nd4 CTCTTTGGTATTGCTGCCTACCTTGTTCATGATCTATTCTGAGTGCGGACTACTAACGTACTATATGACCTGTGCTTATAACCACCAAACTGACTTGGCTGGGGCTTGCTAG  
wild-type\_nd4 CTCTTTGGTATTGCTGCCTACCTTGTTCATGATCTATTCTGAGTGCGGACTACTAACGTACTATATGACCTGTGCTTATAACCACCAAACTGACTTGGCTGGGGCTTGCTAG

modified\_nd4 CTGTCCCTGCTGTAAAATTCATTGATGCCTGTACACTTGTGGTTGCCAGAGGCTCACGTAGCTGCTCCAACTGCTGGGAGTGTATTGCTAGCTGGGTACTATTGAACTAGGA  
wild-type\_nd4 CTGTCCCTGCTGTAAAATTCATTGATGCCTGTACACTTGTGGTTGCCAGAGGCTCACGTAGCTGCTCCAACTGCTGGTGTAGTATTGCTAGCTGGGTACTATTGAACTAGGA

modified\_nd4 GGCAATCGGTTTCTTGGGTTTCACTGCTTCCTGTAGTACCAGAGTTCTGTGTTAGCGTATTCCCACTAGTATCTACTCTGTGTTTGGTCAGCTTCTTGTTTAGTACCTTGAGTACTCT  
wild-type\_nd4 GGCAATCGGTTTCTTGGGTTTCACTGCTTCCTGTAGTACCAGAGTTCTGTGTTAGCGTATTCCCACTAGTATCTACTCTGTGTTTGGTCAGCTTCTTGTTTAGTACCTTGAGTACTCT

modified\_nd4 ACGTCAAATTGATCTAAAGAAAATCGTTGCTTACTCTAGTATTGCTCACATGCTATGGTTACCCTTGCCATTTTCAGCCAAAGCGAGTTCAGTGCTTACAGCTCTAGCTTCTTGA  
wild-type\_nd4 ACGTCAAATTGATCTAAAGAAAATCGTTGCTTACTCTAGTATTGCTCACATGCTATGGTTACCCTTGCCATTTTCAGCCAAAGCGAGTTCAGTGCTTACAGCTCTAGCTTCTTGA

modified\_nd4 TGATTGCTCAGGGCTTGATTTCTCCTGCCTTGTCTTGTATTGTAGGGATCTTGTATGACCGGCTCATACTAAATTCATCCTATACTTCAGCGGCTAGGCTAGCATGCCAATC  
wild-type\_nd4 TGATTGCTCAGGGCTTGATTTCTCCTGCCTTGTCTTGTATTGTAGGGATCTTGTATGACCGGCTCATACTAAATTCATCCTATACTTCAGCGGCTAGGCTAGCATGCCAATC

modified\_nd4 GGAAGCACTTTGTCTTCTTGTTTTACTTTGGGAACTTGGCCTTCCCACTATTCCCTAACTTCATTGCCGAGGTATTGTGCATGGTAAGCATCTTCGCTGTACACGAGTTGCTTGC  
wild-type\_nd4 GGAAGCACTTTGTCTTCTTGTTTTACTTTGGGAACTTGGCCTTCCCACTATTCCCTAACTTCATTGCCGAGGTATTGTGCATGGTAAGCATCTTCGCTGTACACGAGTTGCTTGC

modified\_nd4 TTACGTTTCTGCGTATGCCAAGTACTAGGCTCTGCTTACGGCTTCTGGGCTTTCAACCGTGTGTACATGGGTTGCCACGTTGGCTCTGCCAGCTTACTCGTACTGAGTTCCATA  
wild-type\_nd4 TTACGTTTCTGCGTATGCCAAGTACTAGGCTCTGCTTACGGCTTCTGGGCTTTCAACCGTGTGTACATGGGTTGCCACGTTGGCTCTGCCAGCTTACTCGTACTGAGTTCCATA

modified\_nd4 CTGTCCACCATTGCTAATTTGGGCTGTATGGCTAGGGATTAACCAATGGCTTAA  
wild-type\_nd4 CTGTCCACCATTGCTAATTTGGTGTGTATGGCTAGGGATTAACCAATGGCTTAA

4R3\*

4F2\*

T22-11

T11-10
