# Supplementary material for: Co-Evolution of Mitochondrial tRNA Import and Codon Usage Determines Translational Efficiency in the Green Alga Chlamydomonas
Source: PubMed Central journal article supplement (PMC3447967; doi:10.1371/journal.pgen.1002946), 2012-09-20
Supplement: pgen.1002946.s003.pdf [file pgen.1002946.s003.pdf]

### Figure S3

modified\_nd5 ATGTTTTTGTGTCTGTTTTCTTTCCCTACTAGGGGGCTTGTTAACTTCCCAATTGCTCGTTTTCTAGGCATCGTGGAGTAGTATTATTGCTATTGGTGCATGGT  
wild-type\_nd5 ATGTTTTTGTGTCTGTTTTCTTTCCCTACTAGGTGGTCTTGTTAACTTCCCAATTGCTCGTTTTCTAGGCATCGTGGAGTAGTATTATTGCTATTGGTGCATGGT

modified\_nd5 GGTAGCCTTTATCTAGCGTTGTAATCTATTACGAGGTTGATTTATGGGTGCGCGGTAAGCGTCGACGCTTTGGGACTTGGTTCTCCGTCGGGACCTTTCATGCCGGT  
wild-type\_nd5 GGTAGCCTTTATCTAGCGTTGTAATCTATTACGAGGTTGATTTATGGGTGCGCGGTAAGCGTCGACGCTTTGGTACTTGGTTCTCCGTCGGTACCTTTCATGCCGGT

modified\_nd5 GGACTTTTAACTTCGACCTACTAACCGCCAACATGCTATTACCCTTACCCTGGTAAGTATGGCCGTACACATGTACGCCGTGACTACATGCGTCAAGATCCCCACTTGAAC  
wild-type\_nd5 GGACTTTTAACTTCGACCTACTAACCGCCAACATGCTATTACCCTTACCCTGGTAAGTATGGCCGTACACATGTACGCCGTGACTACATGCGTCAAGATCCCCACTTGAAC

modified\_nd5 TTGTTTTTGGGTATCTAAGCTACTTTACTGGCTTTATGTGCGTACTTGTAGCCGCTGATAACTTGTGGTTATGCTTGTGGTTGGGAGGGATCGGCTTTGTTCTACCT  
wild-type\_nd5 TTGTTTTTGGGTATCTAAGCTACTTTACTGGCTTTATGTGCGTACTTGTAGCCGCTGATAACTTGTGGTTATGCTTGTGGTTGGGAGGGATCGGCTTTGTTCTACCT

modified\_nd5 ATTGATCGGTACTGGAGTCATCGTCTATCCGCCGTTAAAAGTGTCAAAAAGCCATTTTGGTTAACCGTGTAGTGATGGTTGCTAATGTGGGGCTCTTGTGGGTATGGT  
wild-type\_nd5 ATTGATCGGTACTGGAGTCATCGTCTATCCGCCGTTAAAAGTGTCAAAAAGCCATTTTGGTTAACCGTGTAGTGATGGTTGCTAATGTGGGGCTCTTGTGGGTATGGT

modified\_nd5 ACCATTTGGGAGTCTAGAGTATGATTTGCTTAACTTTATTTCTGCCAGCGGTTTGTAGGCTTTCTATCTTATTGGGGCTATGGGAAAATCCGCTCAGATTTTGTCCAC  
wild-type\_nd5 ACCATTTGGTAGTCTAGAGTATGATTTGCTTAACTTTATTTCTGCCAGCGGCTTTGTAGGCTTTCTATCTTATTGGGGCTATGGGAAAATCCGCTCAGATTTTGTCCAC

modified\_nd5 GTTTGGCTTGTGATGCCATGGAGGGCCAACCCAGTATCCGCCCTAATTCACGCCGCTACTCTGGTCACTGCTGGGTATACTTGTCTGACGCTTGCATATCCACGATG  
wild-type\_nd5 GTTTGGCTTGTGATGCCATGGAGGGCCAACCCAGTATCCGCCCTAATTCACGCCGCTACTCTGGTCACTGCTGGGTATACTTGTCTGACGCTTGCATATCCACGATG

modified\_nd5 GATGTTTGTATCATCGTAGGAGCTTGACCGCTTTTATGGCTGGGTGTTCGGGACCCTCAAAGTATTGAAACGTGTCATTGCTTACAGTACTTGCAGTCAACTTGGGT  
wild-type\_nd5 GATGTTTGTATCATCGTAGGAGCTTGACCGCTTTTATGGCTGGGTGTTCGGGACCCTCAAAGTATTGAAACGTGTCATTGCTTACAGTACTTGCAGTCAACTTGGCT

modified\_nd5 ATATGATGGTTAGTCTGGGCTAGGGGAGACTGGGGGAGGCTAGCATGGGCACCTTATGACTACGCTAGTTTTAAAGCCGCTCTATTTGGCCGCCGGATGGTTATT  
wild-type\_nd5 ATATGATGGTTAGTCTGGGCTAGGGGAGACTGGGGGAGGCTAGCATGGGCACCTTATGACTACGCTAGTTTTAAAGCCGCTCTATTTGGCCGCCGGATGGTTATT

modified\_nd5 AGCGGGAACGGGGGAACAGCACATCGCTCGTTACGGGGGAGTGCTCACAGTGTATGTTCACTATGTAACCTTGATGGTCGCTCCTTGAGTTTGATTGGTGGCCAGA  
wild-type\_nd5 AGCGGTAACGGTGGTAACAGCACATCGCTCGTTACGGTGGTAGTGCTCACAGTGTATGTTCACTATGTAACCTTGATGGTCGCTCCTTGAGTTTGATTGGTGGCCAGA

modified\_nd5 GCTAAGTGGCTTCTATTCTAAAGAGACCATCTTGAACCTGGCCGCTATTGGCGCTGATCCAATTGCCGATGTCGCTCATACTTTGCTATTGCTAACTGCTATGCTAACCGTG  
wild-type\_nd5 GCTAAGTGGCTTCTATTCTAAAGAGACCATCTTGAACCTGGCCGCTATTGGCGCTGATCCAATTGCCGATGTCGCTCATACTTTGCTATTGCTAACTGCTATGCTAACCGTG

modified\_nd5 CTTACACCATAAGTTGTTCTATCAGTGTCTTATGGTTGATTTCTCTGGTCTAGTGTAAACCCAGTTCGCAATGTTTGGCAATTTGGCTATGGCTATTTGTTGCTAGAC  
wild-type\_nd5 CTTACACCATAAGTTGTTCTATCAGTGTCTTATGGTTGATTTCTCTGGTCTAGTGTAAACCCAGTTCGCAATGTTTGGCAATTTGGCTATGGCTATTTGTTGCTAGAC

modified\_nd5 ATTTATGCTAAAAGTATGGGTAGGCAACCACTTGTGTCCGGATGTTGTTCTTCTACCATGGGGGTTAAAACCTACCTTTTGGTTGATGGTTGCCGGATTTTGACTGC  
wild-type\_nd5 ATTTATGCTAAAAGTATGGGTAGGTAACCACTTGTGTCCGGATGTTGTTCTTCTACCATGGGGGTTAAAACCTACCTTTTGGTTGATGGTTGCCGGATTTTGACTGC

modified\_nd5 CACTGCTGCTTGGCTCTGAGCGTTTTACTTTGATTGCTTCTGTTGCTCTCGCTGGGGTTCGATCAATTGTTGCTCGCAGTCCAGTAAACCAATCTTTGACCTAGGGC  
wild-type\_nd5 CACTGCTGCTTGGCTCTGAGCGTTTTACTTTGATTGCTTCTGTTGCTCTCGCTGGGGTTCGATCAATTGTTGCTCGCAGTCCAGTAAACCAATCTTTGACCTAGGGC

modified\_nd5 GAATCACTTGGGCTATTGGGACCGCGGTTGCTAAGCGTTGCAATTTGCGTGTAA  
wild-type\_nd5 GAATCACTTGGGCTATTGGTACCGCGGTTGCTAAGCGTTGCAATTTGCGTGTAA
