# Supplementary material for: Co-Evolution of Mitochondrial tRNA Import and Codon Usage Determines Translational Efficiency in the Green Alga Chlamydomonas
Source: PubMed Central journal article supplement (PMC3447967; doi:10.1371/journal.pgen.1002946), 2012-09-20
Supplement: pgen.1002946.s004.pdf [file pgen.1002946.s004.pdf]

**Table S1**

| <b>Name</b> | <b>Position</b> | <b>Oligonucleotide sequence</b> |
|-------------|-----------------|---------------------------------|
| <b>telF</b> | 520-538         | GTAAAAAGTGTGTCAATGC             |
| <b>cobF</b> | 595-614         | GTGGTTGACAAACAAGTAGG            |
| <b>cobR</b> | 1165-1144       | TTGAACCGCTTCTACAGCTTCC          |
| <b>4F1</b>  | 1692-1711       | GTAAATAATAAATAACAAAG            |
| <b>4F2</b>  | 2003-2022       | TTGGCATGCTAGCACCTAGA            |
| <b>4F2*</b> | 2003-2022       | TTGGCATGCTAGCCCCTAGC            |
| <b>4F3</b>  | 2765-2780       | CAGTGCGCAGCAACAT                |
| <b>4R3*</b> | 2492-2073       | CAAAGTGTACTTGGTTGGGGT           |
| <b>4R1</b>  | 3091-3071       | CTCAATAGTGGTGCTCGTCAC           |
| <b>4R2</b>  | 2542-2523       | CTGAGTGCGGTACTACTAAC            |
| <b>5F1</b>  | 3247-3265       | CATTGAAACAAGCACGCAG             |
| <b>5F2*</b> | 3920-3938       | GTGCTGGTTCCCCCGTTC              |
| <b>5R1</b>  | 4952-4933       | GTTGTCTGTTTTCTTTCCCC            |
| <b>5R2*</b> | 4430-4523       | GGCTAGGGGAGACTGGGGGG            |
| <b>6F</b>   | 7996-8015       | GCATTGCCGTAGGATACACC            |
| <b>6R</b>   | 8409-8391       | CGAAACGACCAAACAGAGC             |
