# Supplementary material for: Co-Evolution of Mitochondrial tRNA Import and Codon Usage Determines Translational Efficiency in the Green Alga Chlamydomonas
Source: PubMed Central journal article supplement (PMC3447967; doi:10.1371/journal.pgen.1002946), 2012-09-20
Supplement: pgen.1002946.s005.pdf [file pgen.1002946.s005.pdf]

**Table S2**

| <b>Name</b> | <b>tRNA target</b> | <b>tRNA sequence and the oligonucleotide position underlined</b>                                                      |
|-------------|--------------------|-----------------------------------------------------------------------------------------------------------------------|
| <b>G1</b>   | Gly GCC            | GCACTAGTGGTATAGTGGTAGCATAGGTCCTT <b>GCC</b> ACGGACCAGACCCGAGTTCGATTCTCGGCTAGTGCA                                      |
| <b>G2</b>   | Gly UCC            | GCGCTACTAGTCCAGTGGTTAGGATATTTGCCTT <b>CCA</b> AGCAAAGAGCCGGGTTTCGATTCCCGGGTAGGGCA                                     |
| <b>G3</b>   | Gly CCC            | GCGCTAGTGGTGTAGTAGCAGCATTACGCCT <b>CCC</b> ACGCGTAAGACTCGGGTGCAAATCCCGGCTAGCGCA                                       |
| <b>Mm</b>   | Met CAU mt         | AGACACGTAGCTTAGTGGTAAAGCACTGGTCT <b>CATA</b> AGCCAGCTATCGCAAGTTCGAATCTCGCCGTGTCTA                                     |
| <b>Qm</b>   | Gln TTG mt         | TGGGGCATAGCCAAGTGGTAAGGCATTGGACT <b>TTG</b> ACTCCAAGATGCATGGGTTTCGAATCCTATTGCCCCAG                                    |
| <b>L</b>    | Leu AAG            | GGCGATGTGGCCGAGTGGTCAAGGCGCAGGATT <b>AAG</b> GCTCCTGTCCGCAAGGGCGTAGGTTTCGAACCCTACCATCGTCA                             |
| <b>V</b>    | Val AAC            | GGAATCATGGTGTAGTTGGTTATCACACCTGTCT <b>AAC</b> ACACAGGAGGTCTCCAGTTCGATCCTGGATGATTCCA                                   |
| <b>L3am</b> | rRNA mt            | ATGAGTGCCTAAGCACTCAATTTCCGGTCTCGGTGAAACCGAGCATCCAATACTAAAGAACTTTACTGGCTTAGTACTGGGACC<br>CCATTTTTAGTATACCTACATTATATACA |
